# Supplementary material
Source: ML conference proceedings conference paper supplement (https://openreview.net/forum?id=RPyemmvfqNF)
Supplement: supplementary_material [file attachment]

— MotifNorm — MotifNorm w/o RE — MotifNorm w/o RC — BatchNorm
