# Supplementary material
Source: ML conference proceedings conference paper supplement (https://openreview.net/forum?id=RPyemmvfqNF)
Supplement: supplementary_material [file attachment]

—★— MotifNorm —★— GroupNorm —★— BatchNorm —★— NodeNorm —★— MeanNorm —★— PairNorm
